# Supplementary material for: Transcriptome-based prediction of drugs, inhibiting cardiomyogenesis in human induced pluripotent stem cells
Source: Research Square preprint supplement (doi:10.21203/rs.3.rs-2989657/v1), 2023-06-26
Supplement: Supplementary file 1 [file 2dda47c56bb3aa721c94606b.xlsx]

## Sheet: Sheet2
Compound	Abbre-viation	Tested concentration [µM]	Beating	CDIscore
		1-fold Cmaxb
Non-teratogens
Ampicillin	AMP	107	Yes	0.1*a
Ascorbic acid	ASC	200	Yes	0
Buspirone	BSP	0.0244	Yes	0
Chlorpheniramine	CPA	0.0304	Yes	0
Dextromethorphan	DEX	0.15	Yes	0
Diphenhydramine	DPH	0.3	Yes	0
Doxylamine	DOA	0.38	Yes	0.03
Famotidine	FAM	1.06	Yes	0
Folic acid	FOA	0.38	Yes	0.03
Levothyroxine	LEV	0.077	Yes	0.03
Liothyronine	LIO	0.00307	Yes	0.06*b
Magnesium (chloride)	MAG	1200	Yes	0
Methicillin	MET	140	Yes	0
Ranitidine	RAN	0.8	Yes	0
Retinold	RET	1d	Yes	0
Sucralose	SUC	2.5	Yes	0.2
Teratogens
9-cis-Retinoic acid	9RA	1	No	1
Acitretin	ACI	1.2	No	1
Isotretinoin	ISO	1.7	No	1
Atorvastatin	ATO	0.54	Yes	0
Carbamazepine	CMZ	19	Yes	0.03
Entinostat	ENT	0.2	Yes	0.2*c
Favipiravir	FPV	382	Yes	0
Leflunomide	LFL	370	Yes	0.3*d
Lithium (chloride)	LTH	1000	Yes	0.2*e
Methotrexate	MTX	1	Yes	0.2
Methylmercury	MEM	0.02	Yes	0.1*f
Paroxetine	PAX	1.2	Yes	0.2*g
Teriflunomide	TER	370	Yes	0.3*h
Thalidomide	THD	3.9	Yes	0.3
Trichostatin A	TSA	0.01	Yes	0.1*i
Valproic acid	VPA	600	Yes	0.4
Vismodegib	VIS	20	Yes	0
